# Supplementary material for: Potential Involvement of Adiponectin Signaling in Regulating Physical Exercise-Elicited Hippocampal Neurogenesis and Dendritic Morphology in Stressed Mice
Source: PubMed Central journal article supplement (PMC7381385; doi:10.3389/fncel.2020.00189), 2020-07-03
Supplement: Data_Sheet_1.pdf [file Data_Sheet_1.pdf]

*Supplementary Information*

**1. Supplemental Tables**

**Supplemental Table 1. Proprietary Taqman probes for real-time PCR detection from Applied Biosystems Inc.**

| <b>Target</b> | <b>Assay ID of FAM-labeled MGB Probe</b> |
|---------------|------------------------------------------|
| Actb          | Mm00607939_s1                            |
| AdipoR1       | Mm01291334_mH                            |
| AdipoR2       | Mm01184032_m1                            |
| Appl1         | Mm00507526_m1                            |

Actb:  $\beta$ -actin; AdipoR1: adiponectin receptor 1; AdipoR2: adiponectin receptor 2; Appl1: adaptor protein containing PH domain, PTB domain and leucine zipper motif 1

## Adiponectin Mitigates Depression Following Exercise

**Supplemental Table 2. Summary of statistical results by ANOVA**

|                                             |                       |                        |                         |                         |                |
|---------------------------------------------|-----------------------|------------------------|-------------------------|-------------------------|----------------|
| <b>Figure No.</b>                           | <b>Test Used</b>      | <b>n</b>               |                         |                         |                |
| 1B. Serum COR                               | Two-way ANOVA         | 10-11 per group        |                         |                         |                |
| <b>ANOVA Table-1</b>                        | <b>Sum of Squares</b> | <b>DF</b>              | <b>Means of Squares</b> | <b>F (DFn, DFd)</b>     | <b>P value</b> |
| Interaction                                 | 8.443                 | 1                      | 8.443                   | F (1, 38) = 0.003204    | P=0.9552       |
| Genotype                                    | 747.6                 | 1                      | 747.6                   | F (1, 38) = 0.2837      | P=0.5974       |
| Drug                                        | 212213                | 1                      | 212213                  | F (1, 38) = 80.53       | P<0.0001       |
| Residual                                    | 100134                | 38                     | 2635                    |                         |                |
| <b>Multiple Comparisons</b>                 |                       |                        |                         |                         |                |
| <b>Turkey's multiple comparisons test-1</b> | <b>Mean Diff</b>      | <b>95% CI of diff.</b> | <b>Significant?</b>     | <b>Adjusted P value</b> |                |
| WVN vs. WCN                                 | -141.4                | -201.7 to -81.17       | Yes                     | <0.0001                 |                |
| KVN vs. KCN                                 | -143.2                | -203.5 to -82.97       | Yes                     | <0.0001                 |                |
| <b>ANOVA Table-2</b>                        | <b>Sum of Squares</b> | <b>DF</b>              | <b>Means of Squares</b> | <b>F (DFn, DFd)</b>     | <b>P value</b> |
| Interaction                                 | 2522                  | 1                      | 2522                    | F (1, 36) = 0.6181      | P=0.4369       |
| Genotype                                    | 693.9                 | 1                      | 693.9                   | F (1, 36) = 0.1701      | P=0.6825       |
| Exercise                                    | 492.8                 | 1                      | 492.8                   | F (1, 36) = 0.1208      | P=0.7302       |
| Residual                                    | 146879                | 36                     | 4080                    |                         |                |
| <b>Multiple Comparisons</b>                 |                       |                        |                         |                         |                |
| <b>Turkey's multiple comparisons test-2</b> | <b>Mean Diff</b>      | <b>95% CI of diff.</b> | <b>Significant?</b>     | <b>Adjusted P value</b> |                |
| WCN vs. WCR                                 | 8.86                  | -68.07 to 85.79        | No                      | 0.9895                  |                |
| KCN vs. KCR                                 | -22.9                 | -99.83 to 54.03        | No                      | 0.8532                  |                |
| <b>Figure No.</b>                           | <b>Test Used</b>      | <b>n</b>               |                         |                         |                |
| 1C. Sucrose preference test                 | Two-way ANOVA         | 8-18 per group         |                         |                         |                |
| <b>ANOVA Table-1</b>                        | <b>Sum of Squares</b> | <b>DF</b>              | <b>Means of Squares</b> | <b>F (DFn, DFd)</b>     | <b>P value</b> |
| Interaction                                 | 79.92                 | 1                      | 79.92                   | F (1, 51) = 1.923       | P=0.1715       |
| Genotype                                    | 57.65                 | 1                      | 57.65                   | F (1, 51) = 1.387       | P=0.2443       |
| Drug                                        | 8881                  | 1                      | 8881                    | F (1, 51) = 213.7       | P<0.0001       |
| Residual                                    | 2119                  | 51                     | 41.55                   |                         |                |
| <b>Multiple Comparisons</b>                 |                       |                        |                         |                         |                |
| <b>Turkey's multiple comparisons test-1</b> | <b>Mean Diff</b>      | <b>95% CI of diff.</b> | <b>Significant?</b>     | <b>Adjusted P value</b> |                |
| WVN vs. WCN                                 | 23.99                 | 17.37 to 30.62         | Yes                     | <0.0001                 |                |
| KVN vs. KCN                                 | 29.02                 | 22.03 to 36.01         | Yes                     | <0.0001                 |                |
| <b>ANOVA Table-2</b>                        | <b>Sum of Squares</b> | <b>DF</b>              | <b>Means of Squares</b> | <b>F (DFn, DFd)</b>     | <b>P value</b> |
| Interaction                                 | 296.5                 | 1                      | 296.5                   | F (1, 38) = 4.803       | P=0.0346       |
| Genotype                                    | 339.3                 | 1                      | 339.3                   | F (1, 38) = 5.497       | P=0.0244       |
| Exercise                                    | 297.6                 | 1                      | 297.6                   | F (1, 38) = 4.821       | P=0.0343       |
| Residual                                    | 2346                  | 38                     | 61.73                   |                         |                |
| <b>Multiple Comparisons</b>                 |                       |                        |                         |                         |                |
| <b>Turkey's multiple comparisons test-2</b> | <b>Mean Diff</b>      | <b>95% CI of diff.</b> | <b>Significant?</b>     | <b>Adjusted P value</b> |                |
| WCN vs. WCR                                 | -10.88                | -20.69 to -1.072       | Yes                     | 0.0247                  |                |
| KCN vs. KCR                                 | -0.01016              | -9.028 to 9.008        | No                      | >0.9999                 |                |
| WCN vs. KCN                                 | 0.379                 | -9.108 to 9.866        | No                      | 0.9995                  |                |
| WCR vs. KCR                                 | 11.25                 | 1.894 to 20.60         | Yes                     | 0.0131                  |                |

## Adiponectin Mitigates Depression Following Exercise

|                                                                          |                       |                        |                         |                         |                |
|--------------------------------------------------------------------------|-----------------------|------------------------|-------------------------|-------------------------|----------------|
| <b>Figure No.</b>                                                        | <b>Test Used</b>      | <b>n</b>               |                         |                         |                |
| 1D. Force swim test                                                      | Two-way ANOVA         | 13-22 per group        |                         |                         |                |
| <b>ANOVA Table-1</b>                                                     | <b>Sum of Squares</b> | <b>DF</b>              | <b>Means of Squares</b> | <b>F (DFn, DFd)</b>     | <b>P value</b> |
| Interaction                                                              | 105.9                 | 1                      | 105.9                   | F (1, 64) = 0.1086      | P=0.7429       |
| Genotype                                                                 | 288.6                 | 1                      | 288.6                   | F (1, 64) = 0.2959      | P=0.5884       |
| Drug                                                                     | 77292                 | 1                      | 77292                   | F (1, 64) = 79.26       | P<0.0001       |
| Residual                                                                 | 62414                 | 64                     | 975.2                   |                         |                |
| <b>Multiple Comparisons<br/>Turkey's multiple<br/>comparisons test-1</b> | <b>Mean Diff</b>      | <b>95% CI of diff.</b> | <b>Significant?</b>     | <b>Adjusted P value</b> |                |
| WVN vs. WCN                                                              | -71.16                | -97.76 to -44.56       | Yes                     | <0.0001                 |                |
| KVN vs. KCN                                                              | -66.08                | -96.84 to -35.32       | Yes                     | <0.0001                 |                |
| <b>ANOVA Table-2</b>                                                     | <b>Sum of Squares</b> | <b>DF</b>              | <b>Means of Squares</b> | <b>F (DFn, DFd)</b>     | <b>P value</b> |
| Interaction                                                              | 4704                  | 1                      | 4704                    | F (1, 56) = 4.643       | P=0.0355       |
| Genotype                                                                 | 5615                  | 1                      | 5615                    | F (1, 56) = 5.542       | P=0.0221       |
| Exercise                                                                 | 10767                 | 1                      | 10767                   | F (1, 56) = 10.63       | P=0.0019       |
| Residual                                                                 | 56730                 | 56                     | 1013                    |                         |                |
| <b>Multiple Comparisons<br/>Turkey's multiple<br/>comparisons test-2</b> | <b>Mean Diff</b>      | <b>95% CI of diff.</b> | <b>Significant?</b>     | <b>Adjusted P value</b> |                |
| WCN vs. WCR                                                              | 44.9                  | 15.99 to 73.81         | Yes                     | 0.0007                  |                |
| KCN vs. KCR                                                              | 9.165                 | -23.89 to 42.22        | No                      | 0.8829                  |                |
| WCN vs. KCN                                                              | -1.653                | -32.70 to 29.40        | No                      | 0.999                   |                |
| WCR vs. KCR                                                              | -37.39                | -68.44 to -6.338       | Yes                     | 0.0122                  |                |
| <b>Figure No.</b>                                                        | <b>Test Used</b>      | <b>n</b>               |                         |                         |                |
| 1E. Tail suspension test                                                 | Two-way ANOVA         | 8-21 per group         |                         |                         |                |
| <b>ANOVA Table-1</b>                                                     | <b>Sum of Squares</b> | <b>DF</b>              | <b>Means of Squares</b> | <b>F (DFn, DFd)</b>     | <b>P value</b> |
| Interaction                                                              | 0.1153                | 1                      | 0.1153                  | F (1, 62) = 0.0001856   | P=0.9892       |
| Genotype                                                                 | 1066                  | 1                      | 1066                    | F (1, 62) = 1.717       | P=0.1949       |
| Drug                                                                     | 74255                 | 1                      | 74255                   | F (1, 62) = 119.6       | P<0.0001       |
| Residual                                                                 | 38508                 | 62                     | 621.1                   |                         |                |
| <b>Multiple Comparisons<br/>Turkey's multiple<br/>comparisons test-1</b> | <b>Mean Diff</b>      | <b>95% CI of diff.</b> | <b>Significant?</b>     | <b>Adjusted P value</b> |                |
| WVN vs. WCN                                                              | -67.97                | -90.21 to -45.72       | Yes                     | <0.0001                 |                |
| KVN vs. KCN                                                              | -67.8                 | -91.88 to -43.72       | Yes                     | <0.0001                 |                |
| <b>ANOVA Table-2</b>                                                     | <b>Sum of Squares</b> | <b>DF</b>              | <b>Means of Squares</b> | <b>F (DFn, DFd)</b>     | <b>P value</b> |
| Interaction                                                              | 6892                  | 1                      | 6892                    | F (1, 50) = 13.66       | P=0.0005       |
| Genotype                                                                 | 2921                  | 1                      | 2921                    | F (1, 50) = 5.790       | P=0.0199       |
| Drug                                                                     | 4379                  | 1                      | 4379                    | F (1, 50) = 8.680       | P=0.0049       |
| Residual                                                                 | 25223                 | 50                     | 504.5                   |                         |                |
| <b>Multiple Comparisons<br/>Turkey's multiple<br/>comparisons test-2</b> | <b>Mean Diff</b>      | <b>95% CI of diff.</b> | <b>Significant?</b>     | <b>Adjusted P value</b> |                |
| WCN vs. WCR                                                              | 42.32                 | 21.18 to 63.47         | Yes                     | <0.0001                 |                |
| KCN vs. KCR                                                              | -4.778                | -31.23 to 21.68        | No                      | 0.9632                  |                |
| WCN vs. KCN                                                              | 8.219                 | -13.96 to 30.40        | No                      | 0.7587                  |                |
| WCR vs. KCR                                                              | -38.88                | -64.47 to -13.29       | Yes                     | 0.001                   |                |

## Adiponectin Mitigates Depression Following Exercise

|                                             |                       |                        |                         |                         |                |
|---------------------------------------------|-----------------------|------------------------|-------------------------|-------------------------|----------------|
| <b>Figure No.</b>                           | <b>Test Used</b>      | <b>n</b>               |                         |                         |                |
| 1F Hippocampal ADN                          | Two-way ANOVA         | 8 per group            |                         |                         |                |
| <b>ANOVA Table-1</b>                        | <b>Sum of Squares</b> | <b>DF</b>              | <b>Means of Squares</b> | <b>F (DFn, DFd)</b>     | <b>P value</b> |
| Interaction                                 | 0.001724              | 1                      | 0.001724                | F (1, 39) = 0.03608     | P=0.8503       |
| Genotype                                    | 44.3                  | 1                      | 44.3                    | F (1, 39) = 927.2       | P<0.0001       |
| Drug                                        | 0.00157               | 1                      | 0.00157                 | F (1, 39) = 0.03286     | P=0.8571       |
| Residual                                    | 1.863                 | 39                     | 0.04777                 |                         |                |
| <b>Multiple Comparisons</b>                 |                       |                        |                         |                         |                |
| <b>Turkey's multiple comparisons test-1</b> | <b>Mean Diff</b>      | <b>95% CI of diff.</b> | <b>Significant?</b>     | <b>Adjusted P value</b> |                |
| WVN vs. WCN                                 | 0.026                 | -0.1957 to 0.2477      | No                      | 0.989                   |                |
| <b>ANOVA Table-2</b>                        | <b>Sum of Squares</b> | <b>DF</b>              | <b>Means of Squares</b> | <b>F (DFn, DFd)</b>     | <b>P value</b> |
| Interaction                                 | 0.8518                | 1                      | 0.8518                  | F (1, 38) = 13.99       | P=0.0006       |
| Genotype                                    | 57.54                 | 1                      | 57.54                   | F (1, 38) = 944.7       | P<0.0001       |
| Exercise                                    | 0.8259                | 1                      | 0.8259                  | F (1, 38) = 13.56       | P=0.0007       |
| Residual                                    | 2.314                 | 38                     | 0.06091                 |                         |                |
| <b>Multiple Comparisons</b>                 |                       |                        |                         |                         |                |
| <b>Turkey's multiple comparisons test-2</b> | <b>Mean Diff</b>      | <b>95% CI of diff.</b> | <b>Significant?</b>     | <b>Adjusted P value</b> |                |
| WCN vs. WCR                                 | -0.5827               | -0.8435 to -0.3219     | Yes                     | <0.0001                 |                |
| <b>Figure No.</b>                           | <b>Test Used</b>      | <b>n</b>               |                         |                         |                |
| 1G Serum ADN                                | Two-way ANOVA         | 8 per group            |                         |                         |                |
| <b>ANOVA Table-1</b>                        | <b>Sum of Squares</b> | <b>DF</b>              | <b>Means of Squares</b> | <b>F (DFn, DFd)</b>     | <b>P value</b> |
| Interaction                                 | 1.529                 | 1                      | 1.529                   | F (1, 28) = 0.8765      | P=0.3572       |
| Genotype                                    | 1003                  | 1                      | 1003                    | F (1, 28) = 575.0       | P<0.0001       |
| Drug                                        | 1.519                 | 1                      | 1.519                   | F (1, 28) = 0.8710      | P=0.3587       |
| Residual                                    | 48.83                 | 28                     | 1.744                   |                         |                |
| <b>Multiple Comparisons</b>                 |                       |                        |                         |                         |                |
| <b>Turkey's multiple comparisons test-1</b> | <b>Mean Diff</b>      | <b>95% CI of diff.</b> | <b>Significant?</b>     | <b>Adjusted P value</b> |                |
| WVN vs. WCN                                 | 0.8729                | -0.9300 to 2.676       | No                      | 0.5572                  |                |
| <b>ANOVA Table-2</b>                        | <b>Sum of Squares</b> | <b>DF</b>              | <b>Means of Squares</b> | <b>F (DFn, DFd)</b>     | <b>P value</b> |
| Interaction                                 | 99.38                 | 1                      | 99.38                   | F (1, 28) = 11.17       | P=0.0024       |
| Genotype                                    | 1632                  | 1                      | 1632                    | F (1, 28) = 183.5       | P<0.0001       |
| Exercise                                    | 99.07                 | 1                      | 99.07                   | F (1, 28) = 11.14       | P=0.0024       |
| Residual                                    | 249.1                 | 28                     | 8.896                   |                         |                |
| <b>Multiple Comparisons</b>                 |                       |                        |                         |                         |                |
| <b>Turkey's multiple comparisons test-2</b> | <b>Mean Diff</b>      | <b>95% CI of diff.</b> | <b>Significant?</b>     | <b>Adjusted P value</b> |                |
| WCN vs. WCR                                 | -7.044                | -11.12 to -2.972       | Yes                     | 0.0003                  |                |

## Adiponectin Mitigates Depression Following Exercise

|                                                                          |                       |                        |                         |                         |                |
|--------------------------------------------------------------------------|-----------------------|------------------------|-------------------------|-------------------------|----------------|
| <b>Figure No.</b>                                                        | <b>Test Used</b>      | <b>n</b>               |                         |                         |                |
| 2A. BrdU                                                                 | Two-way ANOVA         | 11-12 per group        |                         |                         |                |
| <b>ANOVA Table-1</b>                                                     | <b>Sum of Squares</b> | <b>DF</b>              | <b>Means of Squares</b> | <b>F (DFn, DFd)</b>     | <b>P value</b> |
| Interaction                                                              | 423.2                 | 1                      | 423.2                   | F (1, 42) = 0.04836     | P=0.8270       |
| Genotype                                                                 | 672.7                 | 1                      | 672.7                   | F (1, 42) = 0.07686     | P=0.7830       |
| Drug                                                                     | 674466                | 1                      | 674466                  | F (1, 42) = 77.07       | P<0.0001       |
| Residual                                                                 | 367555                | 42                     | 8751                    |                         |                |
| <b>Multiple Comparisons<br/>Turkey's multiple<br/>comparisons test-1</b> | <b>Mean Diff</b>      | <b>95% CI of diff.</b> | <b>Significant?</b>     | <b>Adjusted P value</b> |                |
| WVN vs. WCN                                                              | 248.5                 | 144.0 to 352.9         | Yes                     | <0.0001                 |                |
| KVN vs. KCN                                                              | 236.3                 | 131.9 to 340.8         | Yes                     | <0.0001                 |                |
| <b>ANOVA Table-2</b>                                                     | <b>Sum of Squares</b> | <b>DF</b>              | <b>Means of Squares</b> | <b>F (DFn, DFd)</b>     | <b>P value</b> |
| Interaction                                                              | 72297                 | 1                      | 72297                   | F (1, 42) = 6.241       | P=0.0165       |
| Genotype                                                                 | 49450                 | 1                      | 49450                   | F (1, 42) = 4.268       | P=0.0450       |
| Exercise                                                                 | 117934                | 1                      | 117934                  | F (1, 42) = 10.18       | P=0.0027       |
| Residual                                                                 | 486570                | 42                     | 11585                   |                         |                |
| <b>Multiple Comparisons<br/>Turkey's multiple<br/>comparisons test-2</b> | <b>Mean Diff</b>      | <b>95% CI of diff.</b> | <b>Significant?</b>     | <b>Adjusted P value</b> |                |
| WCN vs. WCR                                                              | -180.7                | -300.9 to -60.54       | Yes                     | 0.0013                  |                |
| KCN vs. KCR                                                              | -22                   | -142.2 to 98.18        | No                      | 0.961                   |                |
| WCN vs. KCN                                                              | -13.73                | -136.5 to 109.0        | No                      | 0.9906                  |                |
| WCR vs. KCR                                                              | 145                   | 27.46 to 262.5         | Yes                     | 0.0103                  |                |
| <b>Figure No.</b>                                                        | <b>Test Used</b>      | <b>n</b>               |                         |                         |                |
| 2B. Ki67                                                                 | Two-way ANOVA         | 9-15 per group         |                         |                         |                |
| <b>ANOVA Table-1</b>                                                     | <b>Sum of Squares</b> | <b>DF</b>              | <b>Means of Squares</b> | <b>F (DFn, DFd)</b>     | <b>P value</b> |
| Interaction                                                              | 258.2                 | 1                      | 258.2                   | F (1, 42) = 0.03207     | P=0.8587       |
| Genotype                                                                 | 514.4                 | 1                      | 514.4                   | F (1, 42) = 0.06390     | P=0.8017       |
| Drug                                                                     | 839491                | 1                      | 839491                  | F (1, 42) = 104.3       | P<0.0001       |
| Residual                                                                 | 338113                | 42                     | 8050                    |                         |                |
| <b>Multiple Comparisons<br/>Turkey's multiple<br/>comparisons test-1</b> | <b>Mean Diff</b>      | <b>95% CI of diff.</b> | <b>Significant?</b>     | <b>Adjusted P value</b> |                |
| WVN vs. WCN                                                              | 272.2                 | 171.0 to 373.4         | Yes                     | <0.0001                 |                |
| KVN vs. KCN                                                              | 281.9                 | 177.9 to 386.0         | Yes                     | <0.0001                 |                |
| <b>ANOVA Table-2</b>                                                     | <b>Sum of Squares</b> | <b>DF</b>              | <b>Means of Squares</b> | <b>F (DFn, DFd)</b>     | <b>P value</b> |
| Interaction                                                              | 179968                | 1                      | 179968                  | F (1, 37) = 20.75       | P<0.0001       |
| Genotype                                                                 | 174673                | 1                      | 174673                  | F (1, 37) = 20.14       | P<0.0001       |
| Exercise                                                                 | 173217                | 1                      | 173217                  | F (1, 37) = 19.97       | P<0.0001       |
| Residual                                                                 | 320866                | 37                     | 8672                    |                         |                |
| <b>Multiple Comparisons<br/>Turkey's multiple<br/>comparisons test-2</b> | <b>Mean Diff</b>      | <b>95% CI of diff.</b> | <b>Significant?</b>     | <b>Adjusted P value</b> |                |
| WCN vs. WCR                                                              | -267.3                | -374.4 to -160.3       | Yes                     | <0.0001                 |                |
| KCN vs. KCR                                                              | 2.556                 | -115.5 to 120.6        | No                      | >0.9999                 |                |
| WCN vs. KCN                                                              | -2                    | -120.1 to 116.1        | No                      | >0.9999                 |                |
| WCR vs. KCR                                                              | 267.9                 | 160.9 to 374.9         | Yes                     | <0.0001                 |                |

## Adiponectin Mitigates Depression Following Exercise

|                                             |                       |                        |                         |                         |                |
|---------------------------------------------|-----------------------|------------------------|-------------------------|-------------------------|----------------|
| <b>Figure No.</b>                           | <b>Test Used</b>      | <b>n</b>               |                         |                         |                |
| 2C. DCX                                     | Two-way ANOVA         | 9-15 per group         |                         |                         |                |
| <b>ANOVA Table-1</b>                        | <b>Sum of Squares</b> | <b>DF</b>              | <b>Means of Squares</b> | <b>F (DFn, DFd)</b>     | <b>P value</b> |
| Interaction                                 | 229.3                 | 1                      | 229.3                   | F (1, 44) = 0.01116     | P=0.9163       |
| Genotype                                    | 3.22                  | 1                      | 3.22                    | F (1, 44) = 0.0001567   | P=0.9901       |
| Drug                                        | 1017871               | 1                      | 1017871                 | F (1, 44) = 49.54       | P<0.0001       |
| Residual                                    | 904027                | 44                     | 20546                   |                         |                |
| <b>Multiple Comparisons</b>                 |                       |                        |                         |                         |                |
| <b>Turkey's multiple comparisons test-1</b> | <b>Mean Diff</b>      | <b>95% CI of diff.</b> | <b>Significant?</b>     | <b>Adjusted P value</b> |                |
| WVN vs. WCN                                 | 293.6                 | 132.3 to 455.0         | Yes                     | <0.0001                 |                |
| KVN vs. KCN                                 | 302.6                 | 144.1 to 461.0         | Yes                     | <0.0001                 |                |
| <b>ANOVA Table-2</b>                        | <b>Sum of Squares</b> | <b>DF</b>              | <b>Means of Squares</b> | <b>F (DFn, DFd)</b>     | <b>P value</b> |
| Interaction                                 | 218971                | 1                      | 218971                  | F (1, 37) = 27.28       | P<0.0001       |
| Genotype                                    | 230813                | 1                      | 230813                  | F (1, 37) = 28.75       | P<0.0001       |
| Exercise                                    | 214875                | 1                      | 214875                  | F (1, 37) = 26.77       | P<0.0001       |
| Residual                                    | 297006                | 37                     | 8027                    |                         |                |
| <b>Multiple Comparisons</b>                 |                       |                        |                         |                         |                |
| <b>Turkey's multiple comparisons test-2</b> | <b>Mean Diff</b>      | <b>95% CI of diff.</b> | <b>Significant?</b>     | <b>Adjusted P value</b> |                |
| WCN vs. WCR                                 | -294.2                | -398.7 to -189.7       | Yes                     | <0.0001                 |                |
| KCN vs. KCR                                 | 1.389                 | -109.3 to 112.1        | No                      | >0.9999                 |                |
| WCN vs. KCN                                 | 3.944                 | -106.8 to 114.7        | No                      | 0.9997                  |                |
| WCR vs. KCR                                 | 299.6                 | 195.1 to 404.1         | Yes                     | <0.0001                 |                |
| <b>Figure No.</b>                           | <b>Test Used</b>      | <b>n</b>               |                         |                         |                |
| 3C. Total dendritic length                  | Two-way ANOVA         | 12-17 neurons/group    |                         |                         |                |
| <b>ANOVA Table-1</b>                        | <b>Sum of Squares</b> | <b>DF</b>              | <b>Means of Squares</b> | <b>F (DFn, DFd)</b>     | <b>P value</b> |
| Interaction                                 | 4351                  | 1                      | 4351                    | F (1, 57) = 0.1298      | P=0.7200       |
| Genotype                                    | 62027                 | 1                      | 62027                   | F (1, 57) = 1.851       | P=0.1791       |
| Drug                                        | 2797275               | 1                      | 2797275                 | F (1, 57) = 83.46       | P<0.0001       |
| Residual                                    | 1910534               | 57                     | 33518                   |                         |                |
| <b>Multiple Comparisons</b>                 |                       |                        |                         |                         |                |
| <b>Turkey's multiple comparisons test-1</b> | <b>Mean Diff</b>      | <b>95% CI of diff.</b> | <b>Significant?</b>     | <b>Adjusted P value</b> |                |
| WVN vs. WCN                                 | 415.2                 | 230.2 to 600.2         | Yes                     | <0.0001                 |                |
| KVN vs. KCN                                 | 449.3                 | 280.5 to 618.0         | Yes                     | <0.0001                 |                |
| <b>ANOVA Table-2</b>                        | <b>Sum of Squares</b> | <b>DF</b>              | <b>Means of Squares</b> | <b>F (DFn, DFd)</b>     | <b>P value</b> |
| Interaction                                 | 210836                | 1                      | 210836                  | F (1, 55) = 6.584       | P=0.0130       |
| Genotype                                    | 592370                | 1                      | 592370                  | F (1, 55) = 18.50       | P<0.0001       |
| Exercise                                    | 524439                | 1                      | 524439                  | F (1, 55) = 16.38       | P=0.0002       |
| Residual                                    | 1761298               | 55                     | 32024                   |                         |                |
| <b>Multiple Comparisons</b>                 |                       |                        |                         |                         |                |
| <b>Turkey's multiple comparisons test-2</b> | <b>Mean Diff</b>      | <b>95% CI of diff.</b> | <b>Significant?</b>     | <b>Adjusted P value</b> |                |
| WCN vs. WCR                                 | -310.3                | -496.8 to -123.8       | Yes                     | 0.0002                  |                |
| KCN vs. KCR                                 | -69.49                | -245.0 to 106.0        | No                      | 0.866                   |                |
| WCN vs. KCN                                 | 81.41                 | -105.1 to 267.9        | No                      | 0.8052                  |                |
| WCR vs. KCR                                 | 322.2                 | 146.7 to 497.7         | Yes                     | <0.0001                 |                |

## Adiponectin Mitigates Depression Following Exercise

|                                             |                       |                        |                         |                         |                |
|---------------------------------------------|-----------------------|------------------------|-------------------------|-------------------------|----------------|
| <b>Figure No.</b>                           | <b>Test Used</b>      | <b>n</b>               |                         |                         |                |
| 3E. Total number of Intersections           | Two-way ANOVA         | 12-17 neurons/group    |                         |                         |                |
| <b>ANOVA Table-1</b>                        | <b>Sum of Squares</b> | <b>DF</b>              | <b>Means of Squares</b> | <b>F (DFn, DFd)</b>     | <b>P value</b> |
| Interaction                                 | 131.5                 | 1                      | 131.5                   | F (1, 57) = 0.4701      | P=0.4957       |
| Genotype                                    | 244                   | 1                      | 244                     | F (1, 57) = 0.8724      | P=0.3542       |
| Drug                                        | 20181                 | 1                      | 20181                   | F (1, 57) = 72.16       | P<0.0001       |
| Residual                                    | 15940                 | 57                     | 279.7                   |                         |                |
| <b>Multiple Comparisons</b>                 |                       |                        |                         |                         |                |
| <b>Turkey's multiple comparisons test-1</b> | <b>Mean Diff</b>      | <b>95% CI of diff.</b> | <b>Significant?</b>     | <b>Adjusted P value</b> |                |
| WVN vs. WCN                                 | 33.75                 | 16.85 to 50.65         | Yes                     | <0.0001                 |                |
| KVN vs. KCN                                 | 39.68                 | 24.26 to 55.09         | Yes                     | <0.0001                 |                |
| <b>ANOVA Table-2</b>                        | <b>Sum of Squares</b> | <b>DF</b>              | <b>Means of Squares</b> | <b>F (DFn, DFd)</b>     | <b>P value</b> |
| Interaction                                 | 1530                  | 1                      | 1530                    | F (1, 55) = 5.516       | P=0.0225       |
| Genotype                                    | 4331                  | 1                      | 4331                    | F (1, 55) = 15.62       | P=0.0002       |
| Exercise                                    | 3082                  | 1                      | 3082                    | F (1, 55) = 11.11       | P=0.0015       |
| Residual                                    | 15255                 | 55                     | 277.4                   |                         |                |
| <b>Multiple Comparisons</b>                 |                       |                        |                         |                         |                |
| <b>Turkey's multiple comparisons test-2</b> | <b>Mean Diff</b>      | <b>95% CI of diff.</b> | <b>Significant?</b>     | <b>Adjusted P value</b> |                |
| WCN vs. WCR                                 | -24.81                | -42.17 to -7.456       | Yes                     | 0.0016                  |                |
| KCN vs. KCR                                 | -4.3                  | -20.63 to 12.03        | No                      | 0.9792                  |                |
| WCN vs. KCN                                 | 7                     | -10.36 to 24.36        | No                      | 0.8558                  |                |
| WCR vs. KCR                                 | 27.51                 | 11.18 to 43.85         | Yes                     | 0.0002                  |                |

  

|                                             |                       |                        |                         |                         |                |
|---------------------------------------------|-----------------------|------------------------|-------------------------|-------------------------|----------------|
| <b>Figure No.</b>                           | <b>Test Used</b>      | <b>n</b>               |                         |                         |                |
| 4A. Phospho-p38MAPK                         | Two-way ANOVA         | 10 per group           |                         |                         |                |
| <b>ANOVA Table-1</b>                        | <b>Sum of Squares</b> | <b>DF</b>              | <b>Means of Squares</b> | <b>F (DFn, DFd)</b>     | <b>P value</b> |
| Interaction                                 | 133.1                 | 1                      | 133.1                   | F (1, 36) = 0.7220      | P=0.4011       |
| Genotype                                    | 0.144                 | 1                      | 0.144                   | F (1, 36) = 0.0007812   | P=0.9779       |
| Drug                                        | 12.21                 | 1                      | 12.21                   | F (1, 36) = 0.06624     | P=0.7984       |
| Residual                                    | 6636                  | 36                     | 184.3                   |                         |                |
| <b>Multiple Comparisons</b>                 |                       |                        |                         |                         |                |
| <b>Turkey's multiple comparisons test-1</b> | <b>Mean Diff</b>      | <b>95% CI of diff.</b> | <b>Significant?</b>     | <b>Adjusted P value</b> |                |
| WVN vs. WCN                                 | -2.543                | -18.90 to 13.81        | No                      | 0.9749                  |                |
| KVN vs. KCN                                 | 4.753                 | -11.60 to 21.11        | No                      | 0.8617                  |                |
| <b>ANOVA Table-2</b>                        | <b>Sum of Squares</b> | <b>DF</b>              | <b>Means of Squares</b> | <b>F (DFn, DFd)</b>     | <b>P value</b> |
| Interaction                                 | 6.162                 | 1                      | 6.162                   | F (1, 36) = 0.03980     | P=0.8430       |
| Genotype                                    | 207.3                 | 1                      | 207.3                   | F (1, 36) = 1.339       | P=0.2548       |
| Exercise                                    | 23.08                 | 1                      | 23.08                   | F (1, 36) = 0.1491      | P=0.7017       |
| Residual                                    | 5574                  | 36                     | 154.8                   |                         |                |
| <b>Multiple Comparisons</b>                 |                       |                        |                         |                         |                |
| <b>Turkey's multiple comparisons test-2</b> | <b>Mean Diff</b>      | <b>95% CI of diff.</b> | <b>Significant?</b>     | <b>Adjusted P value</b> |                |
| WCN vs. WCR                                 | 0.7343                | -14.25 to 15.72        | No                      | 0.9992                  |                |
| KCN vs. KCR                                 | 2.304                 | -12.68 to 17.29        | No                      | 0.9757                  |                |
| WCN vs. KCN                                 | 3.768                 | -11.22 to 18.76        | No                      | 0.9051                  |                |
| WCR vs. KCR                                 | 5.338                 | -9.650 to 20.33        | No                      | 0.7731                  |                |

## Adiponectin Mitigates Depression Following Exercise

|                                                                          |                       |                        |                         |                         |                |
|--------------------------------------------------------------------------|-----------------------|------------------------|-------------------------|-------------------------|----------------|
| <b>Figure No.</b>                                                        | <b>Test Used</b>      | <b>n</b>               |                         |                         |                |
| 4B. Phospho-AKT                                                          | Two-way ANOVA         | 10 per group           |                         |                         |                |
| <b>ANOVA Table-1</b>                                                     | <b>Sum of Squares</b> | <b>DF</b>              | <b>Means of Squares</b> | <b>F (DFn, DFd)</b>     | <b>P value</b> |
| Interaction                                                              | 55.46                 | 1                      | 55.46                   | F (1, 36) = 0.04020     | P=0.8422       |
| Genotype                                                                 | 117                   | 1                      | 117                     | F (1, 36) = 0.08479     | P=0.7726       |
| Drug                                                                     | 72.25                 | 1                      | 72.25                   | F (1, 36) = 0.05236     | P=0.8203       |
| Residual                                                                 | 49670                 | 36                     | 1380                    |                         |                |
| <b>Multiple Comparisons<br/>Turkey's multiple<br/>comparisons test-1</b> | <b>Mean Diff</b>      | <b>95% CI of diff.</b> | <b>Significant?</b>     | <b>Adjusted P value</b> |                |
| WVN vs. WCN                                                              | -0.3328               | -45.07 to 44.41        | No                      | >0.9999                 |                |
| KVN vs. KCN                                                              | -5.043                | -49.78 to 39.70        | No                      | 0.9901                  |                |
| <b>ANOVA Table-2</b>                                                     | <b>Sum of Squares</b> | <b>DF</b>              | <b>Means of Squares</b> | <b>F (DFn, DFd)</b>     | <b>P value</b> |
| Interaction                                                              | 417.5                 | 1                      | 417.5                   | F (1, 36) = 0.3326      | P=0.5677       |
| Genotype                                                                 | 291.2                 | 1                      | 291.2                   | F (1, 36) = 0.2320      | P=0.6330       |
| Exercise                                                                 | 84.57                 | 1                      | 84.57                   | F (1, 36) = 0.06738     | P=0.7967       |
| Residual                                                                 | 45181                 | 36                     | 1255                    |                         |                |
| <b>Multiple Comparisons<br/>Turkey's multiple<br/>comparisons test-2</b> | <b>Mean Diff</b>      | <b>95% CI of diff.</b> | <b>Significant?</b>     | <b>Adjusted P value</b> |                |
| WCN vs. WCR                                                              | 9.369                 | -33.30 to 52.04        | No                      | 0.934                   |                |
| KCN vs. KCR                                                              | -3.553                | -46.22 to 39.12        | No                      | 0.9959                  |                |
| WCN vs. KCN                                                              | 1.065                 | -41.60 to 43.73        | No                      | 0.9999                  |                |
| WCR vs. KCR                                                              | -11.86                | -54.53 to 30.81        | No                      | 0.8767                  |                |
| <b>Figure No.</b>                                                        | <b>Test Used</b>      | <b>n</b>               |                         |                         |                |
| 4C. Phospho-AMPK                                                         | Two-way ANOVA         | 10 per group           |                         |                         |                |
| <b>ANOVA Table-1</b>                                                     | <b>Sum of Squares</b> | <b>DF</b>              | <b>Means of Squares</b> | <b>F (DFn, DFd)</b>     | <b>P value</b> |
| Interaction                                                              | 8.264                 | 1                      | 8.264                   | F (1, 36) = 0.01076     | P=0.9180       |
| Genotype                                                                 | 243                   | 1                      | 243                     | F (1, 36) = 0.3164      | P=0.5773       |
| Drug                                                                     | 2548                  | 1                      | 2548                    | F (1, 36) = 3.317       | P=0.0769       |
| Residual                                                                 | 27656                 | 36                     | 768.2                   |                         |                |
| <b>Multiple Comparisons<br/>Turkey's multiple<br/>comparisons test-1</b> | <b>Mean Diff</b>      | <b>95% CI of diff.</b> | <b>Significant?</b>     | <b>Adjusted P value</b> |                |
| WVN vs. WCN                                                              | -15.05                | -48.44 to 18.33        | No                      | 0.6219                  |                |
| KVN vs. KCN                                                              | -16.87                | -50.25 to 16.51        | No                      | 0.5313                  |                |
| <b>ANOVA Table-2</b>                                                     | <b>Sum of Squares</b> | <b>DF</b>              | <b>Means of Squares</b> | <b>F (DFn, DFd)</b>     | <b>P value</b> |
| Interaction                                                              | 9209                  | 1                      | 9209                    | F (1, 36) = 4.685       | P=0.0371       |
| Genotype                                                                 | 11811                 | 1                      | 11811                   | F (1, 36) = 6.008       | P=0.0192       |
| Exercise                                                                 | 12696                 | 1                      | 12696                   | F (1, 36) = 6.459       | P=0.0155       |
| Residual                                                                 | 70765                 | 36                     | 1966                    |                         |                |
| <b>Multiple Comparisons<br/>Turkey's multiple<br/>comparisons test-2</b> | <b>Mean Diff</b>      | <b>95% CI of diff.</b> | <b>Significant?</b>     | <b>Adjusted P value</b> |                |
| WCN vs. WCR                                                              | -65.98                | -119.4 to -12.58       | Yes                     | 0.0104                  |                |
| KCN vs. KCR                                                              | -5.285                | -58.69 to 48.12        | No                      | 0.9933                  |                |
| WCN vs. KCN                                                              | 64.71                 | 11.31 to 118.1         | Yes                     | 0.0123                  |                |
| WCR vs. KCR                                                              | 299.6                 | 195.1 to 404.1         | Yes                     | <0.0001                 |                |



## Adiponectin Mitigates Depression Following Exercise

|                                                                          |                       |                        |                         |                         |                |
|--------------------------------------------------------------------------|-----------------------|------------------------|-------------------------|-------------------------|----------------|
| <b>Figure No.</b>                                                        | <b>Test Used</b>      | <b>n</b>               |                         |                         |                |
| 4D. Phospho-Erk                                                          | Two-way ANOVA         | 10 per group           |                         |                         |                |
| <b>ANOVA Table-1</b>                                                     | <b>Sum of Squares</b> | <b>DF</b>              | <b>Means of Squares</b> | <b>F (DFn, DFd)</b>     | <b>P value</b> |
| Interaction                                                              | 376.9                 | 1                      | 376.9                   | F (1, 36) = 0.1386      | P=0.7119       |
| Genotype                                                                 | 73.99                 | 1                      | 73.99                   | F (1, 36) = 0.02720     | P=0.8699       |
| Drug                                                                     | 672                   | 1                      | 672                     | F (1, 36) = 0.2471      | P=0.6222       |
| Residual                                                                 | 97906                 | 36                     | 2720                    |                         |                |
| <b>Multiple Comparisons<br/>Turkey's multiple<br/>comparisons test-1</b> | <b>Mean Diff</b>      | <b>95% CI of diff.</b> | <b>Significant?</b>     | <b>Adjusted P value</b> |                |
| WVN vs. WCN                                                              | -14.34                | -77.15 to 48.48        | No                      | 0.9267                  |                |
| KVN vs. KCN                                                              | -2.058                | -64.87 to 60.75        | No                      | 0.9997                  |                |
| <b>ANOVA Table-2</b>                                                     | <b>Sum of Squares</b> | <b>DF</b>              | <b>Means of Squares</b> | <b>F (DFn, DFd)</b>     | <b>P value</b> |
| Interaction                                                              | 1.888                 | 1                      | 1.888                   | F (1, 36) = 0.0006156   | P=0.9803       |
| Genotype                                                                 | 89.09                 | 1                      | 89.09                   | F (1, 36) = 0.02904     | P=0.8656       |
| Exercise                                                                 | 115.5                 | 1                      | 115.5                   | F (1, 36) = 0.03766     | P=0.8472       |
| Residual                                                                 | 110424                | 36                     | 3067                    |                         |                |
| <b>Multiple Comparisons<br/>Turkey's multiple<br/>comparisons test-2</b> | <b>Mean Diff</b>      | <b>95% CI of diff.</b> | <b>Significant?</b>     | <b>Adjusted P value</b> |                |
| WCN vs. WCR                                                              | 3.833                 | -62.87 to 70.54        | No                      | 0.9987                  |                |
| KCN vs. KCR                                                              | 2.964                 | -63.74 to 69.67        | No                      | 0.9994                  |                |
| WCN vs. KCN                                                              | 3.419                 | -63.29 to 70.13        | No                      | 0.999                   |                |
| WCR vs. KCR                                                              | 2.55                  | -64.16 to 69.26        | No                      | 0.9996                  |                |
| <b>Figure No.</b>                                                        | <b>Test Used</b>      | <b>n</b>               |                         |                         |                |
| 5B. Tuj1                                                                 | Two-way ANOVA         | 6 per group            |                         |                         |                |
| <b>ANOVA Table</b>                                                       | <b>Sum of Squares</b> | <b>DF</b>              | <b>Means of Squares</b> | <b>F (DFn, DFd)</b>     | <b>P value</b> |
| Interaction                                                              | 0.1204                | 1                      | 0.1204                  | F (1, 20) = 0.08729     | P=0.7707       |
| Genotype                                                                 | 0.02042               | 1                      | 0.02042                 | F (1, 20) = 0.01480     | P=0.9044       |
| Drug                                                                     | 0.0002667             | 1                      | 0.0002667               | F (1, 20) = 0.0001933   | P=0.9890       |
| Residual                                                                 | 27.59                 | 20                     | 1.38                    |                         |                |
| <b>Multiple Comparisons<br/>Turkey's multiple<br/>comparisons test</b>   | <b>Mean Diff</b>      | <b>95% CI of diff.</b> | <b>Significant?</b>     | <b>Adjusted P value</b> |                |
| WN vs. WA                                                                | -0.1483               | -2.046 to 1.750        |                         | 0.9962                  |                |
| KN vs. KA                                                                | 0.135                 | -1.763 to 2.033        | No                      | 0.9971                  |                |
| WN vs. KN                                                                | -0.2                  | -2.098 to 1.698        | No                      | 0.9908                  |                |
| WA vs. KA                                                                | 0.08333               | -1.815 to 1.981        | No                      | 0.9993                  |                |

## Adiponectin Mitigates Depression Following Exercise

|                                           |                       |                        |                         |                         |                |
|-------------------------------------------|-----------------------|------------------------|-------------------------|-------------------------|----------------|
| <b>Figure No.</b>                         | <b>Test Used</b>      | <b>n</b>               |                         |                         |                |
| 5C. Cell phospho-AMPK                     | One-way ANOVA         | 4 per group            |                         |                         |                |
| <b>ANOVA Table</b>                        | <b>Sum of Squares</b> | <b>DF</b>              | <b>Means of Squares</b> | <b>F (DFn, DFd)</b>     | <b>P value</b> |
| Treatment                                 | 10.62                 | 4                      | 2.656                   | F (4, 15) = 62.70       | P<0.0001       |
| Residual                                  | 0.6353                | 15                     | 0.04236                 |                         |                |
| Total                                     | 11.26                 | 19                     |                         |                         |                |
| <b>Multiple Comparisons</b>               |                       |                        |                         |                         |                |
| <b>Turkey's multiple comparisons test</b> | <b>Mean Diff</b>      | <b>95% CI of diff.</b> | <b>Significant?</b>     | <b>Adjusted P value</b> |                |
| Ctrl vs. ADN                              | -1.62                 | -2.069 to -1.170       | Yes                     | <0.0001                 |                |
| Ctrl vs. COR                              | -0.06275              | -0.5121 to 0.3866      | No                      | 0.992                   |                |
| Ctrl vs. ADN + COR                        | -1.289                | -1.738 to -0.8391      | Yes                     | <0.0001                 |                |
| ADN vs. COR                               | 1.557                 | 1.108 to 2.006         | Yes                     | <0.0001                 |                |
| ADN vs. ADN + COR + Cpd C                 | 1.725                 | 1.275 to 2.174         | Yes                     | <0.0001                 |                |
| ADN + COR vs. ADN + COR + Cpd C           | 1.393                 | 0.9439 to 1.843        | Yes                     | <0.0001                 |                |
| <b>Figure No.</b>                         | <b>Test Used</b>      | <b>n</b>               |                         |                         |                |
| 5D. Cell proliferation                    | One-way ANOVA         | 3 per group            |                         |                         |                |
| <b>ANOVA Table</b>                        | <b>Sum of Squares</b> | <b>DF</b>              | <b>Means of Squares</b> | <b>F (DFn, DFd)</b>     | <b>P value</b> |
| Treatment                                 | 34153                 | 3                      | 11384                   | F (3, 188) = 175.6      | P<0.0001       |
| Residual                                  | 12189                 | 188                    | 64.83                   |                         |                |
| Total                                     | 46342                 | 191                    |                         |                         |                |
| <b>Multiple Comparisons</b>               |                       |                        |                         |                         |                |
| <b>Turkey's multiple comparisons test</b> | <b>Mean Diff</b>      | <b>95% CI of diff.</b> | <b>Significant?</b>     | <b>Adjusted P value</b> |                |
| Ctrl vs. COR                              | 31.55                 | 27.29 to 35.81         | Yes                     | <0.0001                 |                |
| Ctrl vs. ADN + COR                        | 7.158                 | 2.898 to 11.42         | Yes                     | 0.0001                  |                |
| Ctrl vs. ADN + COR + Cpd C                | 27.7                  | 23.44 to 31.96         | Yes                     | <0.0001                 |                |
| COR vs. ADN + COR                         | -24.39                | -28.65 to -20.13       | Yes                     | <0.0001                 |                |
| COR vs. ADN + COR + Cpd C                 | -3.85                 | -8.110 to 0.4105       | No                      | 0.0922                  |                |
| ADN + COR vs. ADN + COR + Cpd C           | 20.54                 | 16.28 to 24.80         | Yes                     | <0.0001                 |                |

## Adiponectin Mitigates Depression Following Exercise

|                                |                      |                 |           |                      |                |
|--------------------------------|----------------------|-----------------|-----------|----------------------|----------------|
| <b>Figure No.</b>              | <b>Test Used</b>     | <b>n</b>        |           |                      |                |
| sfig.1A. Total moving distance | Two-way ANOVA        | 13-22 per group |           |                      |                |
| <b>ANOVA table-1</b>           | <b>SS (Type III)</b> | <b>DF</b>       | <b>MS</b> | <b>F (DFn, DFd)</b>  | <b>P value</b> |
| Interaction                    | 58482                | 1               | 58482     | F (1, 60) = 0.06005  | P=0.8073       |
| Genotype                       | 3849463              | 1               | 3849463   | F (1, 60) = 3.952    | P=0.0514       |
| Drug                           | 750053               | 1               | 750053    | F (1, 60) = 0.7701   | P=0.3837       |
| Residual                       | 58436445             | 60              | 973941    |                      |                |
| <b>ANOVA table-2</b>           | <b>SS (Type III)</b> | <b>DF</b>       | <b>MS</b> | <b>F (DFn, DFd)</b>  | <b>P value</b> |
| Interaction                    | 326201               | 1               | 326201    | F (1, 76) = 0.3357   | P=0.5640       |
| Genotype                       | 1877695              | 1               | 1877695   | F (1, 76) = 1.932    | P=0.1686       |
| Exercise                       | 1043429              | 1               | 1043429   | F (1, 76) = 1.074    | P=0.3034       |
| Residual                       | 73853556             | 76              | 971757    |                      |                |
| <b>Figure No.</b>              | <b>Test Used</b>     | <b>n</b>        |           |                      |                |
| sfig.1B. Mean velocity         | Two-way ANOVA        | 13-22 per group |           |                      |                |
| <b>ANOVA table-1</b>           | <b>SS (Type III)</b> | <b>DF</b>       | <b>MS</b> | <b>F (DFn, DFd)</b>  | <b>P value</b> |
| Interaction                    | 0.1527               | 1               | 0.1527    | F (1, 60) = 0.05621  | P=0.8134       |
| Genotype                       | 10.87                | 1               | 10.87     | F (1, 60) = 4.001    | P=0.0500       |
| Drug                           | 1.957                | 1               | 1.957     | F (1, 60) = 0.7205   | P=0.3994       |
| Residual                       | 163                  | 60              | 2.716     |                      |                |
| <b>ANOVA table-2</b>           | <b>SS (Type III)</b> | <b>DF</b>       | <b>MS</b> | <b>F (DFn, DFd)</b>  | <b>P value</b> |
| Interaction                    | 1.085                | 1               | 1.085     | F (1, 76) = 0.3977   | P=0.5302       |
| Genotype                       | 5.009                | 1               | 5.009     | F (1, 76) = 1.835    | P=0.1795       |
| Exercise                       | 2.83                 | 1               | 2.83      | F (1, 76) = 1.037    | P=0.3118       |
| Residual                       | 207.4                | 76              | 2.729     |                      |                |
| <b>Figure No.</b>              | <b>Test Used</b>     | <b>n</b>        |           |                      |                |
| sfig.2A. Hippocampal BDNF      | Two-way ANOVA        | 12-14 per group |           |                      |                |
| <b>ANOVA table-1</b>           | <b>SS (Type III)</b> | <b>DF</b>       | <b>MS</b> | <b>F (DFn, DFd)</b>  | <b>P value</b> |
| Interaction                    | 29.02                | 1               | 29.02     | F (1, 47) = 0.06794  | P=0.7955       |
| Genotype                       | 15.38                | 1               | 15.38     | F (1, 47) = 0.03601  | P=0.8503       |
| Drug                           | 1088                 | 1               | 1088      | F (1, 47) = 2.548    | P=0.1172       |
| Residual                       | 20077                | 47              | 427.2     |                      |                |
| <b>ANOVA table-2</b>           | <b>SS (Type III)</b> | <b>DF</b>       | <b>MS</b> | <b>F (DFn, DFd)</b>  | <b>P value</b> |
| Interaction                    | 60.39                | 1               | 60.39     | F (1, 44) = 0.1376   | P=0.7125       |
| Genotype                       | 1.635                | 1               | 1.635     | F (1, 44) = 0.003725 | P=0.9516       |
| Exercise                       | 37.35                | 1               | 37.35     | F (1, 44) = 0.08507  | P=0.7719       |
| Residual                       | 19316                | 44              | 439       |                      |                |

## Adiponectin Mitigates Depression Following Exercise

|                           |                      |               |             |                        |                |
|---------------------------|----------------------|---------------|-------------|------------------------|----------------|
| <b>Figure No.</b>         | <b>Test Used</b>     | <b>n</b>      |             |                        |                |
| sfig.2B. Hippocampal IGF  | Two-way ANOVA        | 10 per group  |             |                        |                |
| <b>ANOVA table-1</b>      | <b>SS (Type III)</b> | <b>DF</b>     | <b>MS</b>   | <b>F (DFn, DFd)</b>    | <b>P value</b> |
| Interaction               | 0.0001122            | 1             | 0.0001122   | F (1, 36) = 0.02642    | P=0.8718       |
| Genotype                  | 0.000003025          | 1             | 0.000003025 | F (1, 36) = 0.0007122  | P=0.9789       |
| Drug                      | 0.000003025          | 1             | 0.000003025 | F (1, 36) = 0.0007122  | P=0.9789       |
| Residual                  | 0.1529               | 36            | 0.004247    |                        |                |
| <b>ANOVA table-2</b>      | <b>SS (Type III)</b> | <b>DF</b>     | <b>MS</b>   | <b>F (DFn, DFd)</b>    | <b>P value</b> |
| Interaction               | 0.0000676            | 1             | 0.0000676   | F (1, 36) = 0.01479    | P=0.9039       |
| Genotype                  | 0.0002916            | 1             | 0.0002916   | F (1, 36) = 0.06378    | P=0.8021       |
| Exercise                  | 0.003133             | 1             | 0.003133    | F (1, 36) = 0.6853     | P=0.4132       |
| Residual                  | 0.1646               | 36            | 0.004572    |                        |                |
| <b>Figure No.</b>         | <b>Test Used</b>     | <b>n</b>      |             |                        |                |
| sfig.2C. Hippocampal VEGF | Two-way ANOVA        | 5-8 per group |             |                        |                |
| <b>ANOVA table-1</b>      | <b>SS (Type III)</b> | <b>DF</b>     | <b>MS</b>   | <b>F (DFn, DFd)</b>    | <b>P value</b> |
| Interaction               | 421.8                | 1             | 421.8       | F (1, 21) = 2.105      | P=0.1616       |
| Genotype                  | 29.05                | 1             | 29.05       | F (1, 21) = 0.1450     | P=0.7072       |
| Drug                      | 168.5                | 1             | 168.5       | F (1, 21) = 0.8408     | P=0.3696       |
| Residual                  | 4208                 | 21            | 200.4       |                        |                |
| <b>ANOVA table-2</b>      | <b>SS (Type III)</b> | <b>DF</b>     | <b>MS</b>   | <b>F (DFn, DFd)</b>    | <b>P value</b> |
| Interaction               | 826.6                | 1             | 826.6       | F (1, 26) = 3.214      | P=0.0847       |
| Genotype                  | 0.0274               | 1             | 0.0274      | F (1, 26) = 0.0001066  | P=0.9918       |
| Exercise                  | 50.6                 | 1             | 50.6        | F (1, 26) = 0.1967     | P=0.6610       |
| Residual                  | 6687                 | 26            | 257.2       |                        |                |
| <b>Figure No.</b>         | <b>Test Used</b>     | <b>n</b>      |             |                        |                |
| sfig.2D. Hippocampal NGF  | Two-way ANOVA        | 5-8 per group |             |                        |                |
| <b>ANOVA table-1</b>      | <b>SS (Type III)</b> | <b>DF</b>     | <b>MS</b>   | <b>F (DFn, DFd)</b>    | <b>P value</b> |
| Interaction               | 0.0002647            | 1             | 0.0002647   | F (1, 22) = 2.825e-006 | P=0.9987       |
| Genotype                  | 88.23                | 1             | 88.23       | F (1, 22) = 0.9416     | P=0.3424       |
| Drug                      | 50.32                | 1             | 50.32       | F (1, 22) = 0.5370     | P=0.4714       |
| Residual                  | 2062                 | 22            | 93.7        |                        |                |
| <b>ANOVA table-2</b>      | <b>SS (Type III)</b> | <b>DF</b>     | <b>MS</b>   | <b>F (DFn, DFd)</b>    | <b>P value</b> |
| Interaction               | 138.8                | 1             | 138.8       | F (1, 27) = 1.444      | P=0.2399       |
| Genotype                  | 1.86                 | 1             | 1.86        | F (1, 27) = 0.01936    | P=0.8904       |
| Exercise                  | 5.629                | 1             | 5.629       | F (1, 27) = 0.05860    | P=0.8105       |
| Residual                  | 2594                 | 27            | 96.06       |                        |                |

## Adiponectin Mitigates Depression Following Exercise

|                      |                      |                |           |                       |                |
|----------------------|----------------------|----------------|-----------|-----------------------|----------------|
| <b>Figure No.</b>    | <b>Test Used</b>     | <b>n</b>       |           |                       |                |
| sfig.2E. Serum BDNF  | Two-way ANOVA        | 5-10 per group |           |                       |                |
| <b>ANOVA table-1</b> | <b>SS (Type III)</b> | <b>DF</b>      | <b>MS</b> | <b>F (DFn, DFd)</b>   | <b>P value</b> |
| Interaction          | 0.01521              | 1              | 0.01521   | F (1, 23) = 0.05245   | P=0.8209       |
| Genotype             | 0.05906              | 1              | 0.05906   | F (1, 23) = 0.2037    | P=0.6560       |
| Drug                 | 0.009325             | 1              | 0.009325  | F (1, 23) = 0.03217   | P=0.8592       |
| Residual             | 6.668                | 23             | 0.2899    |                       |                |
| <b>ANOVA table-2</b> | <b>SS (Type III)</b> | <b>DF</b>      | <b>MS</b> | <b>F (DFn, DFd)</b>   | <b>P value</b> |
| Interaction          | 0.04978              | 1              | 0.04978   | F (1, 30) = 0.08476   | P=0.7730       |
| Genotype             | 0.1292               | 1              | 0.1292    | F (1, 30) = 0.2200    | P=0.6424       |
| Exercise             | 0.001318             | 1              | 0.001318  | F (1, 30) = 0.002245  | P=0.9625       |
| Residual             | 17.62                | 30             | 0.5874    |                       |                |
| <b>Figure No.</b>    | <b>Test Used</b>     | <b>n</b>       |           |                       |                |
| sfig.2F. Serum IGF   | Two-way ANOVA        | 5-10 per group |           |                       |                |
| <b>ANOVA table-1</b> | <b>SS (Type III)</b> | <b>DF</b>      | <b>MS</b> | <b>F (DFn, DFd)</b>   | <b>P value</b> |
| Interaction          | 9.507                | 1              | 9.507     | F (1, 23) = 0.0008812 | P=0.9766       |
| Genotype             | 6082                 | 1              | 6082      | F (1, 23) = 0.5637    | P=0.4604       |
| Drug                 | 6.24                 | 1              | 6.24      | F (1, 23) = 0.0005784 | P=0.9810       |
| Residual             | 248146               | 23             | 10789     |                       |                |
| <b>ANOVA table-2</b> | <b>SS (Type III)</b> | <b>DF</b>      | <b>MS</b> | <b>F (DFn, DFd)</b>   | <b>P value</b> |
| Interaction          | 2578                 | 1              | 2578      | F (1, 30) = 0.2641    | P=0.6111       |
| Genotype             | 1195                 | 1              | 1195      | F (1, 30) = 0.1225    | P=0.7288       |
| Exercise             | 18733                | 1              | 18733     | F (1, 30) = 1.919     | P=0.1761       |
| Residual             | 292797               | 30             | 9760      |                       |                |
| <b>Figure No.</b>    | <b>Test Used</b>     | <b>n</b>       |           |                       |                |
| sfig.2G. Serum VEGF  | Two-way ANOVA        | 5-10 per group |           |                       |                |
| <b>ANOVA table-1</b> | <b>SS (Type III)</b> | <b>DF</b>      | <b>MS</b> | <b>F (DFn, DFd)</b>   | <b>P value</b> |
| Interaction          | 7.561                | 1              | 7.561     | F (1, 23) = 0.2029    | P=0.6566       |
| Genotype             | 32.86                | 1              | 32.86     | F (1, 23) = 0.8819    | P=0.3574       |
| Drug                 | 27.75                | 1              | 27.75     | F (1, 23) = 0.7446    | P=0.3971       |
| Residual             | 857.1                | 23             | 37.27     |                       |                |
| <b>ANOVA table-2</b> | <b>SS (Type III)</b> | <b>DF</b>      | <b>MS</b> | <b>F (DFn, DFd)</b>   | <b>P value</b> |
| Interaction          | 10.29                | 1              | 10.29     | F (1, 30) = 0.3496    | P=0.5587       |
| Genotype             | 0.03639              | 1              | 0.03639   | F (1, 30) = 0.001236  | P=0.9722       |
| Exercise             | 31.09                | 1              | 31.09     | F (1, 30) = 1.056     | P=0.3123       |
| Residual             | 883.1                | 30             | 29.44     |                       |                |

## Adiponectin Mitigates Depression Following Exercise

|                      |                      |                |           |                     |                |
|----------------------|----------------------|----------------|-----------|---------------------|----------------|
| <b>Figure No.</b>    | <b>Test Used</b>     | <b>n</b>       |           |                     |                |
| sfig.2H. Serum NGF   | Two-way ANOVA        | 5-10 per group |           |                     |                |
| <b>ANOVA table-1</b> | <b>SS (Type III)</b> | <b>DF</b>      | <b>MS</b> | <b>F (DFn, DFd)</b> | <b>P value</b> |
| Interaction          | 13.2                 | 1              | 13.2      | F (1, 23) = 1.943   | P=0.1767       |
| Genotype             | 8.029                | 1              | 8.029     | F (1, 23) = 1.182   | P=0.2883       |
| Drug                 | 3.857                | 1              | 3.857     | F (1, 23) = 0.5676  | P=0.4589       |
| Residual             | 156.3                | 23             | 6.795     |                     |                |
| <b>ANOVA table-2</b> | <b>SS (Type III)</b> | <b>DF</b>      | <b>MS</b> | <b>F (DFn, DFd)</b> | <b>P value</b> |
| Interaction          | 18.64                | 1              | 18.64     | F (1, 30) = 2.099   | P=0.1577       |
| Genotype             | 9.308                | 1              | 9.308     | F (1, 30) = 1.048   | P=0.3141       |
| Exercise             | 7.963                | 1              | 7.963     | F (1, 30) = 0.8966  | P=0.3513       |
| Residual             | 266.4                | 30             | 8.881     |                     |                |
| <b>Figure No.</b>    | <b>Test Used</b>     | <b>n</b>       |           |                     |                |
| sfig.3. AdipoR1      | Two-way ANOVA        | 6-7 per group  |           |                     |                |
| <b>ANOVA table-1</b> | <b>SS (Type III)</b> | <b>DF</b>      | <b>MS</b> | <b>F (DFn, DFd)</b> | <b>P value</b> |
| Interaction          | 0.05443              | 1              | 0.05443   | F (1, 23) = 0.2703  | P=0.6081       |
| Genotype             | 0.1136               | 1              | 0.1136    | F (1, 23) = 0.5640  | P=0.4603       |
| Drug                 | 0.02419              | 1              | 0.02419   | F (1, 23) = 0.1201  | P=0.7320       |
| Residual             | 4.631                | 23             | 0.2014    |                     |                |
| <b>ANOVA table-2</b> | <b>SS (Type III)</b> | <b>DF</b>      | <b>MS</b> | <b>F (DFn, DFd)</b> | <b>P value</b> |
| Interaction          | 0.01955              | 1              | 0.01955   | F (1, 22) = 0.1116  | P=0.7415       |
| Genotype             | 0.1759               | 1              | 0.1759    | F (1, 22) = 1.005   | P=0.3271       |
| Exercise             | 0.007915             | 1              | 0.007915  | F (1, 22) = 0.04521 | P=0.8336       |
| Residual             | 3.852                | 22             | 0.1751    |                     |                |
| <b>Figure No.</b>    | <b>Test Used</b>     | <b>n</b>       |           |                     |                |
| sfig.3. AdipoR2      | Two-way ANOVA        | 6-7 per group  |           |                     |                |
| <b>ANOVA table-1</b> | <b>SS (Type III)</b> | <b>DF</b>      | <b>MS</b> | <b>F (DFn, DFd)</b> | <b>P value</b> |
| Interaction          | 0.04301              | 1              | 0.04301   | F (1, 23) = 0.3494  | P=0.5602       |
| Genotype             | 0.04301              | 1              | 0.04301   | F (1, 23) = 0.3494  | P=0.5602       |
| Drug                 | 0.01075              | 1              | 0.01075   | F (1, 23) = 0.08736 | P=0.7702       |
| Residual             | 2.831                | 23             | 0.1231    |                     |                |
| <b>ANOVA table-2</b> | <b>SS (Type III)</b> | <b>DF</b>      | <b>MS</b> | <b>F (DFn, DFd)</b> | <b>P value</b> |
| Interaction          | 0.002585             | 1              | 0.002585  | F (1, 22) = 0.02532 | P=0.8750       |
| Genotype             | 0.2094               | 1              | 0.2094    | F (1, 22) = 2.051   | P=0.1662       |
| Exercise             | 0.02326              | 1              | 0.02326   | F (1, 22) = 0.2279  | P=0.6378       |
| Residual             | 2.246                | 22             | 0.1021    |                     |                |

## Adiponectin Mitigates Depression Following Exercise

|                        |                      |                     |            |                      |                |
|------------------------|----------------------|---------------------|------------|----------------------|----------------|
| <b>Figure No.</b>      | <b>Test Used</b>     | <b>n</b>            |            |                      |                |
| sfig.3. Appl1          | Two-way ANOVA        | 6-7 per group       |            |                      |                |
| <b>ANOVA table-1</b>   | <b>SS (Type III)</b> | <b>DF</b>           | <b>MS</b>  | <b>F (DFn, DFd)</b>  | <b>P value</b> |
| Interaction            | 0.008232             | 1                   | 0.008232   | F (1, 23) = 0.1835   | P=0.6724       |
| Genotype               | 0.02033              | 1                   | 0.02033    | F (1, 23) = 0.4530   | P=0.5076       |
| Drug                   | 0.0378               | 1                   | 0.0378     | F (1, 23) = 0.8424   | P=0.3682       |
| Residual               | 1.032                | 23                  | 0.04487    |                      |                |
| <b>ANOVA table-2</b>   | <b>SS (Type III)</b> | <b>DF</b>           | <b>MS</b>  | <b>F (DFn, DFd)</b>  | <b>P value</b> |
| Interaction            | 0.002585             | 1                   | 0.002585   | F (1, 22) = 0.07711  | P=0.7838       |
| Genotype               | 0.03166              | 1                   | 0.03166    | F (1, 22) = 0.9446   | P=0.3417       |
| Exercise               | 0.002585             | 1                   | 0.002585   | F (1, 22) = 0.07711  | P=0.7838       |
| Residual               | 0.7374               | 22                  | 0.03352    |                      |                |
| <b>Figure No.</b>      | <b>Test Used</b>     | <b>n</b>            |            |                      |                |
| sfig.5B. Spine density | Two-way ANOVA        | 9-10 branches/group |            |                      |                |
| <b>ANOVA table-1</b>   | <b>SS (Type III)</b> | <b>DF</b>           | <b>MS</b>  | <b>F (DFn, DFd)</b>  | <b>P value</b> |
| Interaction            | 0.001091             | 1                   | 0.001091   | F (1, 35) = 0.05080  | P=0.8230       |
| Genotype               | 0.03798              | 1                   | 0.03798    | F (1, 35) = 1.769    | P=0.1922       |
| Drug                   | 0.00006425           | 1                   | 0.00006425 | F (1, 35) = 0.002992 | P=0.9567       |
| Residual               | 0.7516               | 35                  | 0.02147    |                      |                |
| <b>ANOVA table-2</b>   | <b>SS (Type III)</b> | <b>DF</b>           | <b>MS</b>  | <b>F (DFn, DFd)</b>  | <b>P value</b> |
| Interaction            | 0.0001239            | 1                   | 0.0001239  | F (1, 33) = 0.004488 | P=0.9470       |
| Genotype               | 0.0546               | 1                   | 0.0546     | F (1, 33) = 1.978    | P=0.1690       |
| Exercise               | 0.04321              | 1                   | 0.04321    | F (1, 33) = 1.565    | P=0.2197       |
| Residual               | 0.9111               | 33                  | 0.02761    |                      |                |
| <b>Figure No.</b>      | <b>Test Used</b>     | <b>n</b>            |            |                      |                |
| sfig.5D. PSD95         | Two-way ANOVA        | 5-8 per group       |            |                      |                |
| <b>ANOVA table-1</b>   | <b>SS (Type III)</b> | <b>DF</b>           | <b>MS</b>  | <b>F (DFn, DFd)</b>  | <b>P value</b> |
| Interaction            | 0.002791             | 1                   | 0.002791   | F (1, 22) = 0.5441   | P=0.4685       |
| Genotype               | 0.0011               | 1                   | 0.0011     | F (1, 22) = 0.2144   | P=0.6479       |
| Drug                   | 0.0138               | 1                   | 0.0138     | F (1, 22) = 2.691    | P=0.1152       |
| Residual               | 0.1128               | 22                  | 0.005129   |                      |                |
| <b>ANOVA table-2</b>   | <b>SS (Type III)</b> | <b>DF</b>           | <b>MS</b>  | <b>F (DFn, DFd)</b>  | <b>P value</b> |
| Interaction            | 0.01314              | 1                   | 0.01314    | F (1, 24) = 3.811    | P=0.0627       |
| Genotype               | 0.0006579            | 1                   | 0.0006579  | F (1, 24) = 0.1909   | P=0.6661       |
| Exercise               | 0.0009514            | 1                   | 0.0009514  | F (1, 24) = 0.2761   | P=0.6041       |
| Residual               | 0.08272              | 24                  | 0.003447   |                      |                |

## Adiponectin Mitigates Depression Following Exercise

|                        |                      |               |           |                     |                |
|------------------------|----------------------|---------------|-----------|---------------------|----------------|
| <b>Figure No.</b>      | <b>Test Used</b>     | <b>n</b>      |           |                     |                |
| sfig.5E. GAP43         | Two-way ANOVA        | 5-8 per group |           |                     |                |
| <b>ANOVA table-1</b>   | <b>SS (Type III)</b> | <b>DF</b>     | <b>MS</b> | <b>F (DFn, DFd)</b> | <b>P value</b> |
| Interaction            | 0.002799             | 1             | 0.002799  | F (1, 22) = 0.1706  | P=0.6836       |
| Genotype               | 0.02904              | 1             | 0.02904   | F (1, 22) = 1.769   | P=0.1971       |
| Drug                   | 0.03133              | 1             | 0.03133   | F (1, 22) = 1.909   | P=0.1810       |
| Residual               | 0.3611               | 22            | 0.01641   |                     |                |
| <b>ANOVA table-2</b>   | <b>SS (Type III)</b> | <b>DF</b>     | <b>MS</b> | <b>F (DFn, DFd)</b> | <b>P value</b> |
| Interaction            | 0.006207             | 1             | 0.006207  | F (1, 27) = 0.4438  | P=0.5109       |
| Genotype               | 0.02836              | 1             | 0.02836   | F (1, 27) = 2.028   | P=0.1659       |
| Exercise               | 0.006262             | 1             | 0.006262  | F (1, 27) = 0.4478  | P=0.5091       |
| Residual               | 0.3776               | 27            | 0.01399   |                     |                |
| <b>Figure No.</b>      | <b>Test Used</b>     | <b>n</b>      |           |                     |                |
| sfig.5F. Synaptophysin | Two-way ANOVA        | 5-8 per group |           |                     |                |
| <b>ANOVA table-1</b>   | <b>SS (Type III)</b> | <b>DF</b>     | <b>MS</b> | <b>F (DFn, DFd)</b> | <b>P value</b> |
| Interaction            | 0.02364              | 1             | 0.02364   | F (1, 21) = 4.075   | P=0.0565       |
| Genotype               | 0.0004433            | 1             | 0.0004433 | F (1, 21) = 0.07641 | P=0.7849       |
| Drug                   | 0.01183              | 1             | 0.01183   | F (1, 21) = 2.039   | P=0.1680       |
| Residual               | 0.1218               | 21            | 0.005802  |                     |                |
| <b>ANOVA table-2</b>   | <b>SS (Type III)</b> | <b>DF</b>     | <b>MS</b> | <b>F (DFn, DFd)</b> | <b>P value</b> |
| Interaction            | 0.0003019            | 1             | 0.0003019 | F (1, 24) = 0.04253 | P=0.8384       |
| Genotype               | 0.02866              | 1             | 0.02866   | F (1, 24) = 4.037   | P=0.0559       |
| Exercise               | 0.008728             | 1             | 0.008728  | F (1, 24) = 1.229   | P=0.2785       |
| Residual               | 0.1704               | 24            | 0.007099  |                     |                |
| <b>Figure No.</b>      | <b>Test Used</b>     | <b>n</b>      |           |                     |                |
| sfig.5G. SNAP25        | Two-way ANOVA        | 5-8 per group |           |                     |                |
| <b>ANOVA table-1</b>   | <b>SS (Type III)</b> | <b>DF</b>     | <b>MS</b> | <b>F (DFn, DFd)</b> | <b>P value</b> |
| Interaction            | 0.04895              | 1             | 0.04895   | F (1, 19) = 2.434   | P=0.1353       |
| Genotype               | 0.0231               | 1             | 0.0231    | F (1, 19) = 1.149   | P=0.2973       |
| Drug                   | 0.004044             | 1             | 0.004044  | F (1, 19) = 0.2010  | P=0.6589       |
| Residual               | 0.3822               | 19            | 0.02012   |                     |                |
| <b>ANOVA table-2</b>   | <b>SS (Type III)</b> | <b>DF</b>     | <b>MS</b> | <b>F (DFn, DFd)</b> | <b>P value</b> |
| Interaction            | 0.001644             | 1             | 0.001644  | F (1, 23) = 0.07855 | P=0.7818       |
| Genotype               | 0.001222             | 1             | 0.001222  | F (1, 23) = 0.05839 | P=0.8112       |
| Exercise               | 0.0008375            | 1             | 0.0008375 | F (1, 23) = 0.04001 | P=0.8432       |
| Residual               | 0.4814               | 23            | 0.02093   |                     |                |



2. Supplementary Figures

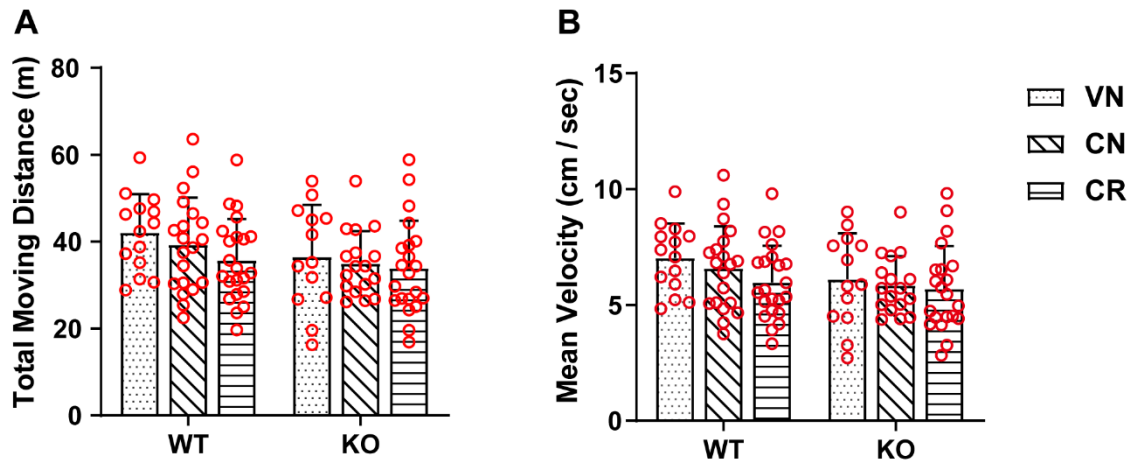

**Supplementary Figure 1. The locomotor activity of WT and ADN-KO mice in the open field test**

The total moving distance (A) and the mean velocity (B) assayed by the open field test suggested that COR or physical exercise did not alter the baseline of locomotor activity in WT or ADN-KO mice. n = 13-22 mice/group.

## Adiponectin Mitigates Depression Following Exercise

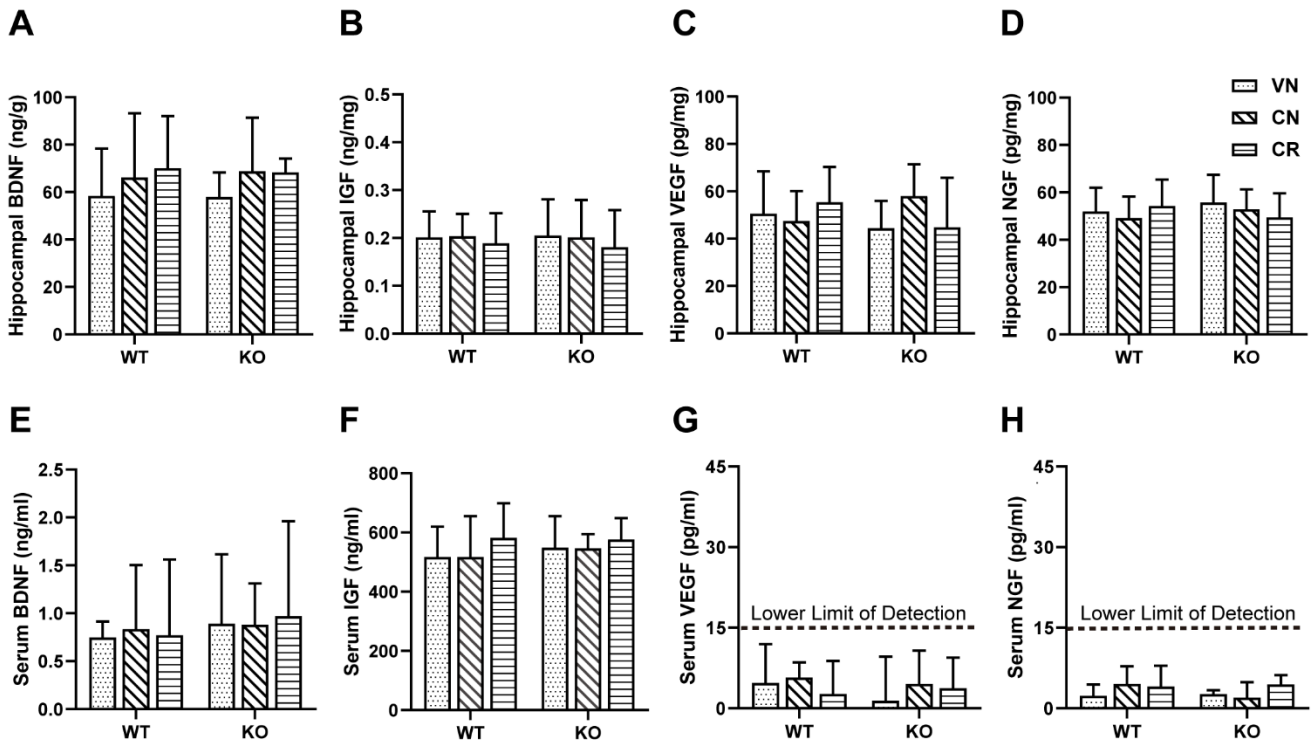

### Supplementary Figure 2. Levels of hippocampal and serum neurotrophins after treatments in WT and ADN-KO mice

The hippocampal levels of BDNF (A), IGF-1 (B), VEGF (C) and NGF (D) were unaffected by either exercise or ADN KO. Similarly, the serum levels of BDNF (E) and IGF-1 (F) were also unaltered by either exercise or ADN KO. Concentrations of VEGF (G) and NGF (H) in the serum were below the lower limit of detection (15 pg/ml). n = 6-8 mice/group. BDNF: brain-derived neurotrophic factor; IGF: insulin-like growth factor 1; VEGF: vascular endothelial growth factor; NGF: nerve growth factor.

## Adiponectin Mitigates Depression Following Exercise

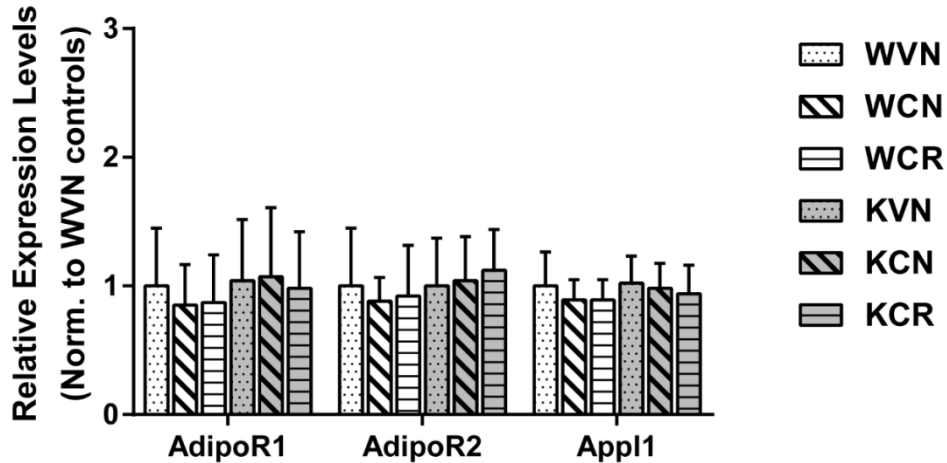

### Supplementary Figure 3. Transcriptional expression profiles of AdipoRs and App1 in the hippocampus of WT and ADN-KO mice

The results of the real-time PCR quantification confirmed similar expression levels of AdipoR1, AdipoR2 and App1 in ADN-KO mice and their WT counterparts. The relative abundances of these three targets were unaltered by exercise or COR-mimicked stress exposure, as evidenced by the comparable levels of the specified targets among all groups. n = 6-8 mice/group. AdipoR1: adiponectin receptor 1; AdipoR2: adiponectin receptor 2; App1: adaptor protein containing PH domain, PTB domain and leucine zipper motif 1.

## Adiponectin Mitigates Depression Following Exercise

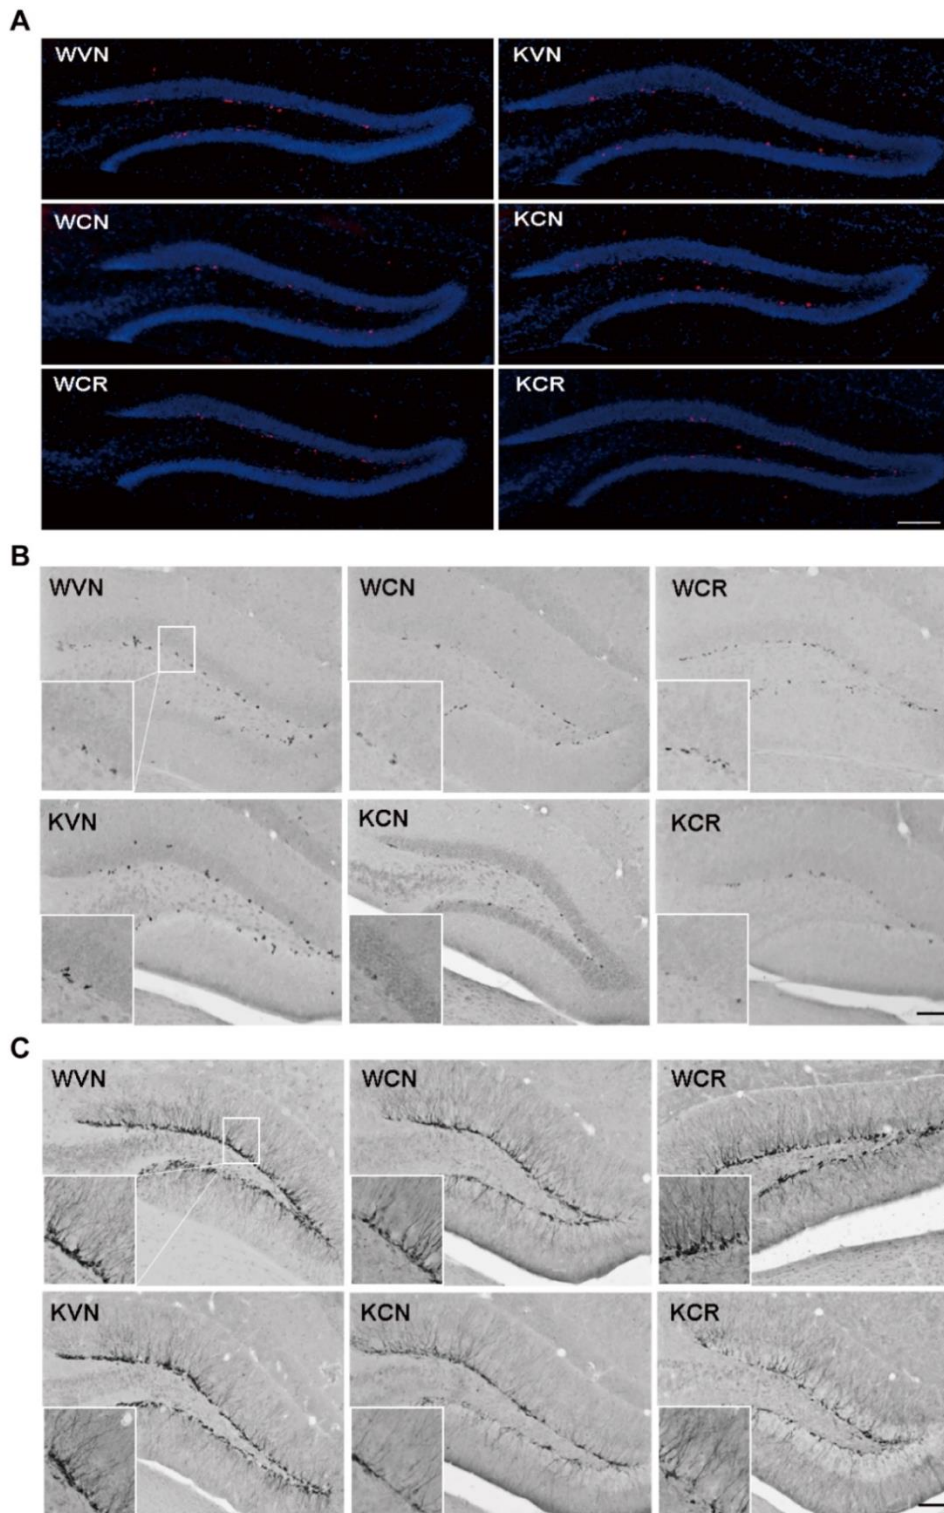

### Supplementary Figure 4. Hippocampal neurogenesis in the dentate gyrus

(A-C) Representative images showing the newborn (BrdU<sup>+</sup>; **A**), proliferating (Ki67<sup>+</sup>; **B**) or immature neuronal (DCX<sup>+</sup>; **C**) cells in the hippocampal dentate gyrus. Scale bars: 100  $\mu$ m. BrdU: bromodeoxyuridine; Ki67: cell proliferation-associated nuclear antigen; DCX: doublecortin.

## Adiponectin Mitigates Depression Following Exercise

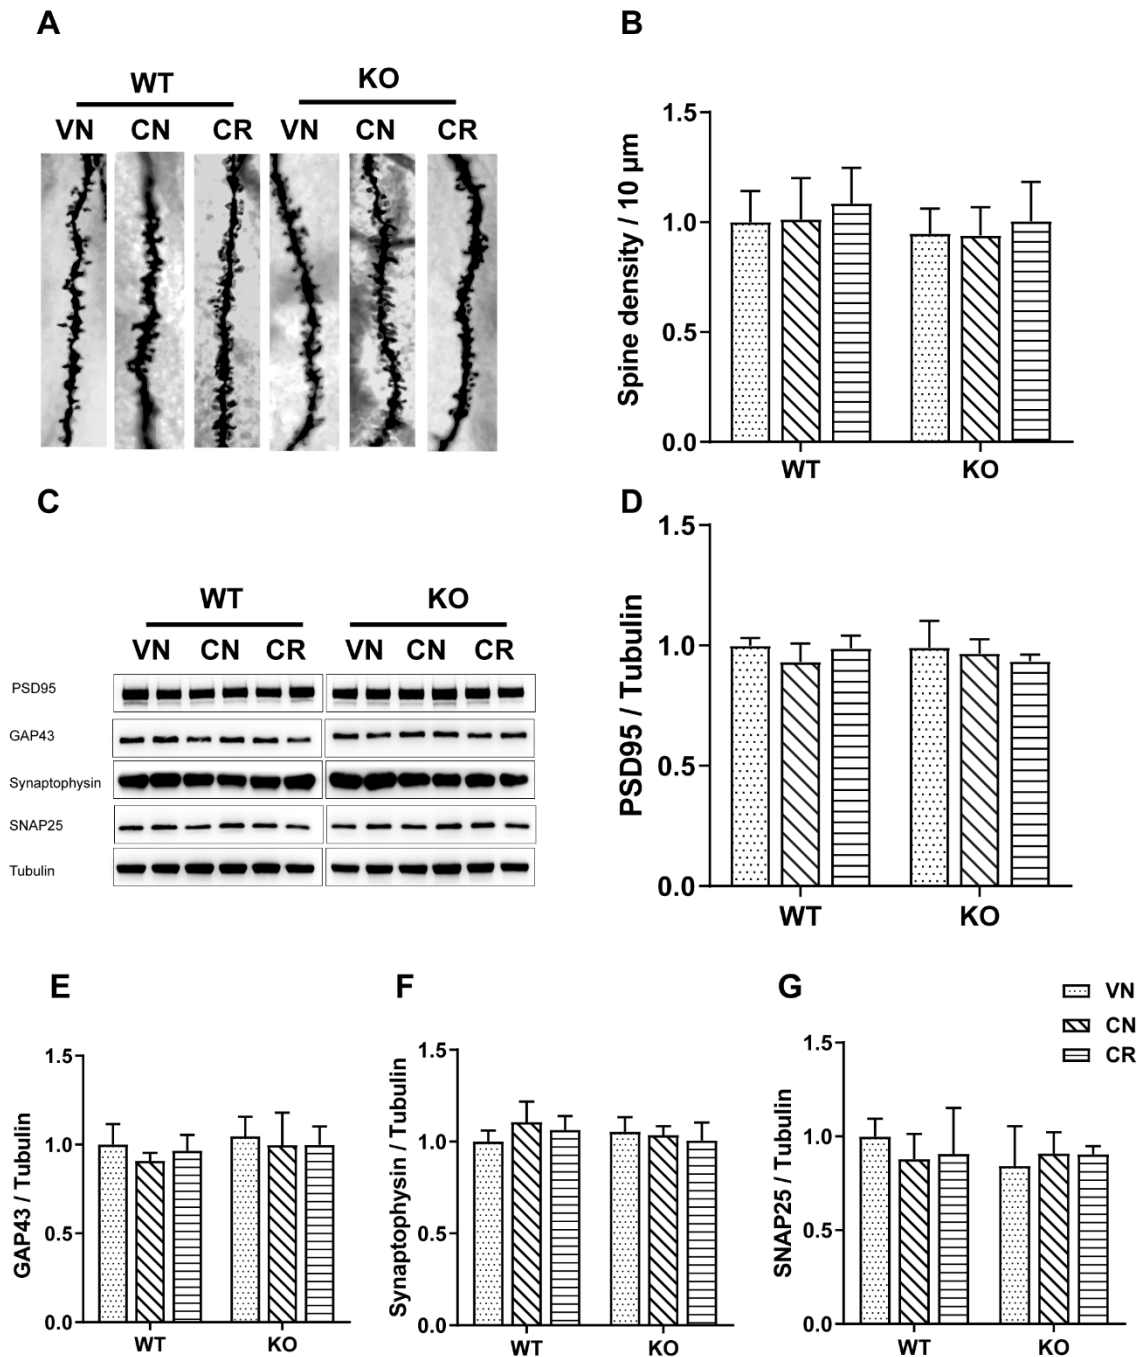

### Supplementary Figure 5. Effects of voluntary wheel running on the dendritic spine density of neurons in the DG and hippocampal levels of synaptic proteins of mice under stress

(A) Representative images showing the dendritic spines of neurons in the hippocampal DG. (B) COR and voluntary wheel running did not significantly affect the spine density in the hippocampus DG of WT and ADN-KO mice. (C) Representative immunoblotting images for PSD95, GAP43, Synaptophysin, SNAP25 and the loading control Tubulin. (D-G) Semi-quantitative analyses for PSD95 (D), GAP43 (E), Synaptophysin (F) and SNAP25 (G). n = 5-8 mice/group. PSD95: postsynaptic density protein 95; GAP43: growth-associated protein 43; SNAP25: synaptosomal-associated protein 25.

## Adiponectin Mitigates Depression Following Exercise

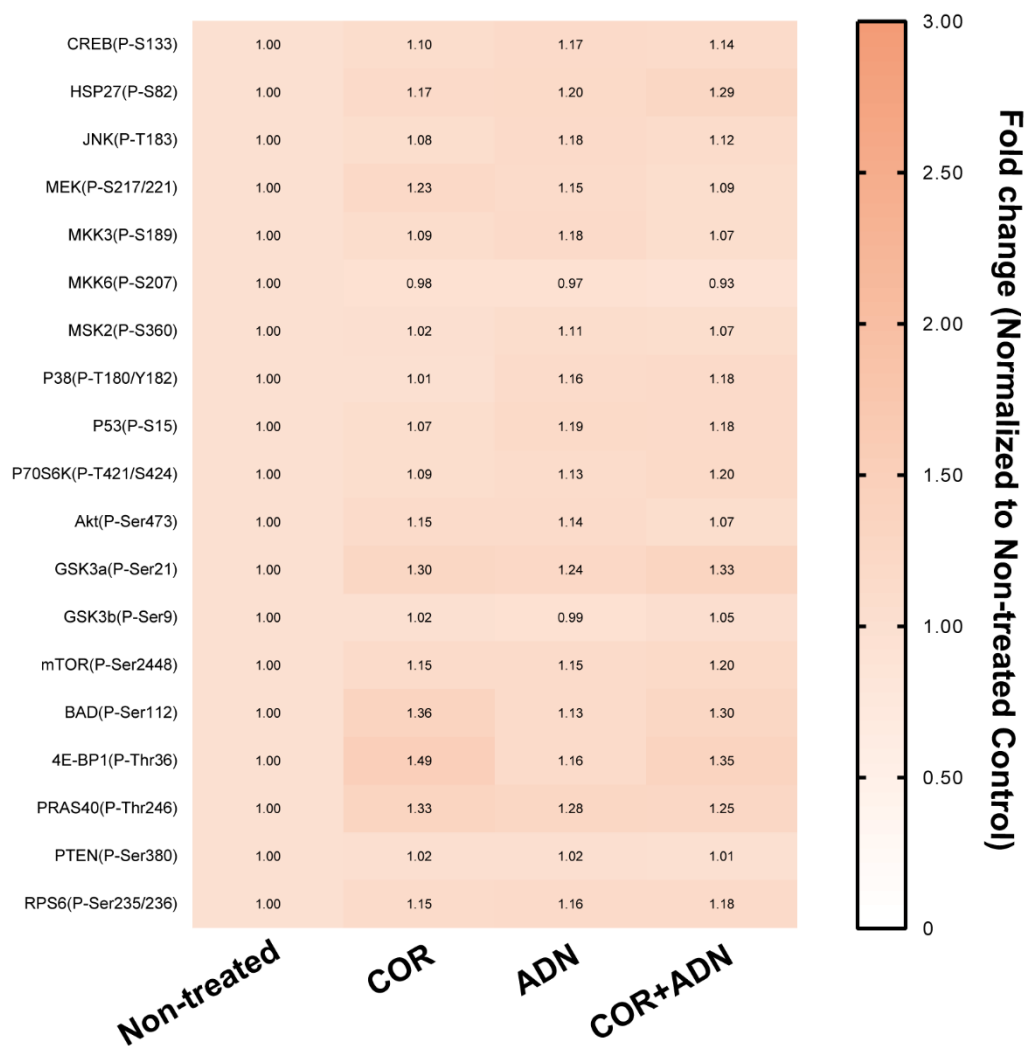

### Supplementary Figure 6. Levels of phosphorylated proteins involved in MAPK and AKT pathways

The levels of phosphorylated targets involved in the MAPK pathway and the AKT pathway were determined with the Human/Mouse MAPK Pathway Phosphorylation Array and AKT Pathway Phosphorylation Array C1, respectively. The normalized ratios between 0.8 and 1.5 suggested insignificant changes. Data were averaged from two independent experiments. COR: corticosterone; ADN: adiponectin.
